# Supplementary material for: Genetic diversity and population structure of advanced clones selected over forty years by a potato breeding program in the USA
Source: Sci Rep. 2021 Apr 16;11:8344. doi: 10.1038/s41598-021-87284-x (PMC8052460; doi:10.1038/s41598-021-87284-x)
Supplement: Supplementary file 12 — Supplementary Information 12. [file 41598_2021_87284_MOESM12_ESM.xlsx]

## Sheet: Sheet1
Supplementary Table S12. SNPs found under selection using the XPEHH test after adopting the false discovery rate of 0.01
snp	chr	position	freq_maj.chipru	freq_min.chipru	freq_maj.red	freq_min.red	XPEHH_chipru_red	logpvalue	method of selection
solcap_snp_c2_21178	1	2808333	0.663551	0.336449	0.511236	0.488764	3.10197	2.71617	XPEHH_chipru_red
PotVar0044864	1	2853653	0.873832	0.126168	0.741573	0.258427	3.42596	3.21281	XPEHH_chipru_red
PotVar0044963	1	2856484	0.61215	0.38785	0.539326	0.460674	3.42082	3.20459	XPEHH_chipru_red
PotVar0044984	1	2856963	0.85514	0.14486	0.820225	0.179775	3.61356	3.51997	XPEHH_chipru_red
solcap_snp_c2_49759	1	19666602	0.523364	0.476636	0.5	0.5	3.01893	2.59573	XPEHH_chipru_rn
solcap_snp_c2_49759	1	19666602	0.61236	0.38764	0.5	0.5	2.89969	2.42767	XPEHH_red_rn
solcap_snp_c2_49758	1	19667145	0.5	0.5	0.5	0.5	3.08322	2.68872	XPEHH_chipru_rn
solcap_snp_c2_49758	1	19667145	0.601124	0.398876	0.5	0.5	2.92147	2.45794	XPEHH_red_rn
solcap_snp_c2_54581	1	24708276	0.518692	0.481308	0.5	0.5	3.16728	2.81283	XPEHH_chipru_rn
PotVar0081045	1	25032740	0.523364	0.476636	0.5	0.5	3.16929	2.81585	XPEHH_chipru_rn
solcap_snp_c1_7143	1	29676849	0.780374	0.219626	0.5	0.5	2.90602	2.43646	XPEHH_chipru_rn
PotVar0122478	1	29682525	0.845794	0.154206	0.921348	0.0786517	-5.60637	7.68484	XPEHH_chipru_red
PotVar0122549	1	29683482	0.845794	0.154206	0.752809	0.247191	-4.77938	5.75488	XPEHH_chipru_red
PotVar0122551	1	29683503	0.528037	0.471963	0.640449	0.359551	-3.78805	3.81862	XPEHH_chipru_red
solcap_snp_c2_20506	1	67223718	0.578652	0.421348	0.5	0.5	-2.87588	2.3948	XPEHH_red_rn
solcap_snp_c2_20507	1	67223836	0.730337	0.269663	0.5	0.5	-2.94595	2.49219	XPEHH_red_rn
PotVar0098497	1	67231112	0.578652	0.421348	0.5	0.5	-2.92393	2.46138	XPEHH_red_rn
solcap_snp_c2_24864	2	46401673	0.556075	0.443925	0.5	0.5	3.28542	2.99212	XPEHH_chipru_rn
solcap_snp_c2_24864	2	46401673	0.640449	0.359551	0.5	0.5	3.9148	4.04344	XPEHH_red_rn
PotVar0002530	2	46731118	0.735955	0.264045	0.5	0.5	2.95338	2.50264	XPEHH_red_rn
solcap_snp_c1_10593	2	47302372	0.859551	0.140449	0.5	0.5	2.88306	2.40469	XPEHH_red_rn
solcap_snp_c2_35789	2	47571153	0.518692	0.481308	0.5	0.5	3.37954	3.13903	XPEHH_chipru_rn
solcap_snp_c2_35789	2	47571153	0.606742	0.393258	0.5	0.5	3.71904	3.69901	XPEHH_red_rn
PotVar0002934	2	47625568	0.747664	0.252336	0.527778	0.472222	3.04995	2.6404	XPEHH_chipru_rn
PotVar0002934	2	47625568	0.595506	0.404494	0.527778	0.472222	3.28012	2.98395	XPEHH_red_rn
PotVar0002940	2	47625643	0.505618	0.494382	0.5	0.5	3.40746	3.1833	XPEHH_red_rn
PotVar0106999	4	3902642	0.728972	0.271028	0.797753	0.202247	-3.40578	3.18062	XPEHH_chipru_red
solcap_snp_c2_31719	4	3903824	0.67757	0.32243	0.780899	0.219101	-3.36406	3.11461	XPEHH_chipru_red
PotVar0106879	4	3916249	0.672897	0.327103	0.769663	0.230337	-3.1119	2.73075	XPEHH_chipru_red
solcap_snp_c2_55781	4	65971250	0.817757	0.182243	0.904494	0.0955056	-3.79204	3.8256	XPEHH_chipru_red
solcap_snp_c2_55780	4	65971280	0.588785	0.411215	0.578652	0.421348	-3.79173	3.82507	XPEHH_chipru_red
solcap_snp_c2_55779	4	65971380	0.817757	0.182243	0.904494	0.0955056	-3.32134	3.04776	XPEHH_chipru_red
PotVar0016970	4	71583669	0.883178	0.116822	0.758427	0.241573	3.37812	3.13677	XPEHH_chipru_red
PotVar0017024	4	71584152	0.61215	0.38785	0.730337	0.269663	3.18032	2.83234	XPEHH_chipru_red
PotVar0017084	4	71585083	0.705607	0.294393	0.674157	0.325843	3.32501	3.05348	XPEHH_chipru_red
PotVar0089841	5	5921368	0.719626	0.280374	0.870787	0.129213	-3.36021	3.10855	XPEHH_chipru_red
PotVar0089840	5	5921471	0.537383	0.462617	0.505618	0.494382	-3.48727	3.31161	XPEHH_chipru_red
PotVar0089832	5	5921687	0.850467	0.149533	0.848315	0.151685	-3.83436	3.90001	XPEHH_chipru_red
PotVar0089769	5	5925972	0.542056	0.457944	0.505618	0.494382	-3.84021	3.91035	XPEHH_chipru_red
PotVar0089758	5	5926165	0.859813	0.140187	0.657303	0.342697	-3.79905	3.83787	XPEHH_chipru_red
PotVar0089751	5	5926378	0.719626	0.280374	0.865169	0.134831	-3.70156	3.66903	XPEHH_chipru_red
solcap_snp_c2_47648	5	5932020	0.654206	0.345794	0.747191	0.252809	-4.00868	4.21424	XPEHH_chipru_red
solcap_snp_c2_47649	5	5932061	0.616822	0.383178	0.719101	0.280899	-4.04748	4.2859	XPEHH_chipru_red
PotVar0089667	5	5942428	0.593458	0.406542	0.516854	0.483146	-4.21558	4.60356	XPEHH_chipru_red
PotVar0089662	5	5942580	0.724299	0.275701	0.882022	0.117978	-4.34632	4.85873	XPEHH_chipru_red
PotVar0089568	5	5943874	0.859813	0.140187	0.657303	0.342697	-3.71402	3.69038	XPEHH_chipru_red
PotVar0083225	6	374959	0.764045	0.235955	0.5	0.5	-2.89336	2.41892	XPEHH_red_rn
PotVar0083119	6	379327	0.623596	0.376404	0.5	0.5	-2.80345	2.2962	XPEHH_red_rn
PotVar0083107	6	379586	0.735955	0.264045	0.5	0.5	-2.79548	2.28548	XPEHH_red_rn
solcap_snp_c2_17380	6	11038742	0.570093	0.429907	0.5	0.5	2.88595	2.40868	XPEHH_chipru_rn
solcap_snp_c2_26498	6	11223944	0.570093	0.429907	0.5	0.5	2.88595	2.40868	XPEHH_chipru_rn
solcap_snp_c2_26499	6	11224867	0.5	0.5	0.5	0.5	2.86246	2.37637	XPEHH_chipru_rn
solcap_snp_c2_26500	6	11224953	0.5	0.5	0.5	0.5	2.86246	2.37637	XPEHH_chipru_rn
solcap_snp_c2_26501	6	11226293	0.5	0.5	0.5	0.5	2.86246	2.37637	XPEHH_chipru_rn
solcap_snp_c2_33105	6	12032376	0.579439	0.420561	0.5	0.5	2.89028	2.41466	XPEHH_chipru_rn
solcap_snp_c2_18787	6	15778047	0.528037	0.471963	0.527778	0.472222	3.16125	2.80384	XPEHH_chipru_rn
solcap_snp_c2_18787	6	15778047	0.567416	0.432584	0.527778	0.472222	2.90173	2.4305	XPEHH_red_rn
solcap_snp_c1_9601	6	17393943	0.5	0.5	0.5	0.5	3.15443	2.79368	XPEHH_chipru_rn
solcap_snp_c1_9601	6	17393943	0.561798	0.438202	0.5	0.5	2.86559	2.38066	XPEHH_red_rn
solcap_snp_c2_58126	6	17700454	0.565421	0.434579	0.555556	0.444444	3.17277	2.82104	XPEHH_chipru_rn
solcap_snp_c2_58126	6	17700454	0.55618	0.44382	0.555556	0.444444	2.88997	2.41422	XPEHH_red_rn
solcap_snp_c2_56793	6	20312642	0.570093	0.429907	0.5	0.5	3.10727	2.72394	XPEHH_chipru_rn
solcap_snp_c2_56793	6	20312642	0.550562	0.449438	0.5	0.5	2.82474	2.32496	XPEHH_red_rn
solcap_snp_c2_56794	6	20312683	0.537383	0.462617	0.5	0.5	3.09135	2.7006	XPEHH_chipru_rn
solcap_snp_c2_56794	6	20312683	0.516854	0.483146	0.5	0.5	2.79758	2.28831	XPEHH_red_rn
solcap_snp_c2_57013	6	21008638	0.509346	0.490654	0.5	0.5	3.06709	2.66523	XPEHH_chipru_rn
solcap_snp_c2_33233	6	21259391	0.537383	0.462617	0.5	0.5	3.06555	2.663	XPEHH_chipru_rn
solcap_snp_c2_33233	6	21259391	0.522472	0.477528	0.5	0.5	2.76803	2.24875	XPEHH_red_rn
solcap_snp_c2_33228	6	21375520	0.5	0.5	0.5	0.5	3.06604	2.66371	XPEHH_chipru_rn
solcap_snp_c2_33226	6	21482244	0.560748	0.439252	0.5	0.5	3.07678	2.67933	XPEHH_chipru_rn
PotVar0083629	6	21731140	0.565421	0.434579	0.5	0.5	3.08308	2.68853	XPEHH_chipru_rn
PotVar0083629	6	21731140	0.544944	0.455056	0.5	0.5	2.76469	2.2443	XPEHH_red_rn
solcap_snp_c2_12403	6	23814407	0.5	0.5	0.5	0.5	3.06636	2.66417	XPEHH_chipru_rn
solcap_snp_c2_12402	6	23933179	0.570093	0.429907	0.5	0.5	3.06226	2.65822	XPEHH_chipru_rn
PotVar0070149	6	46406540	0.616822	0.383178	0.5	0.5	-2.98261	2.54393	XPEHH_chipru_rn
PotVar0022694	7	638064	0.827103	0.172897	0.544944	0.455056	-3.2116	2.87944	XPEHH_chipru_red
PotVar0022691	7	638125	0.714953	0.285047	0.505618	0.494382	-3.2265	2.902	XPEHH_chipru_red
PotVar0022656	7	794645	0.859813	0.140187	0.904494	0.0955056	-3.04654	2.63546	XPEHH_chipru_red
PotVar0102521	7	3039809	0.668539	0.331461	0.5	0.5	-2.78821	2.27572	XPEHH_red_rn
PotVar0028054	7	10836012	0.808411	0.191589	0.904494	0.0955056	-3.70856	3.68101	XPEHH_chipru_red
PotVar0028044	7	10836316	0.635514	0.364486	0.516854	0.483146	-3.17857	2.82972	XPEHH_chipru_red
PotVar0086766	8	43096271	0.825843	0.174157	0.5	0.5	-3.05889	2.65334	XPEHH_red_rn
PotVar0086773	8	43096487	0.550562	0.449438	0.527778	0.472222	-3.03187	2.61432	XPEHH_red_rn
PotVar0086782	8	43096679	0.623596	0.376404	0.5	0.5	-3.0625	2.65858	XPEHH_red_rn
solcap_snp_c2_18894	8	43102244	0.623596	0.376404	0.5	0.5	-3.10506	2.7207	XPEHH_red_rn
PotVar0086804	8	43123379	0.629213	0.370787	0.5	0.5	-2.96005	2.51203	XPEHH_red_rn
PotVar0086811	8	43123529	0.713483	0.286517	0.5	0.5	-2.81678	2.31418	XPEHH_red_rn
PotVar0012337	9	3737678	0.78972	0.21028	0.926966	0.0730337	-3.21325	2.88193	XPEHH_chipru_red
PotVar0012338	9	3737744	0.724299	0.275701	0.679775	0.320225	-3.69049	3.65009	XPEHH_chipru_red
PotVar0012376	9	3738100	0.551402	0.448598	0.550562	0.449438	-3.58657	3.47488	XPEHH_chipru_red
PotVar0012376	9	3738100	0.551402	0.448598	0.5	0.5	-2.95671	2.50733	XPEHH_chipru_rn
PotVar0133829	9	6770581	0.901869	0.0981308	0.696629	0.303371	3.81624	3.86805	XPEHH_chipru_red
PotVar0133826	9	6770692	0.742991	0.257009	0.713483	0.286517	3.04703	2.63618	XPEHH_chipru_red
PotVar0060032	11	9377526	0.546729	0.453271	0.52809	0.47191	-3.07325	2.67419	XPEHH_chipru_red
PotVar0060089	11	9378831	0.742991	0.257009	0.679775	0.320225	-3.11572	2.73638	XPEHH_chipru_red
PotVar0112957	11	40460238	0.542056	0.457944	0.533708	0.466292	3.33265	3.06538	XPEHH_chipru_red
PotVar0031136	12	3089783	0.584112	0.415888	0.691011	0.308989	4.58949	5.3523	XPEHH_chipru_red
PotVar0031141	12	3089855	0.873832	0.126168	0.668539	0.331461	3.35686	3.10329	XPEHH_chipru_red
PotVar0031150	12	3089975	0.514019	0.485981	0.58427	0.41573	3.39144	3.15785	XPEHH_chipru_red
PotVar0110845	12	53313653	0.64486	0.35514	0.679775	0.320225	3.08133	2.68596	XPEHH_chipru_red
